# Supplementary material
Source: publisher site journal article supplement (https://www.dovepress.com/article/supplementary_file/590555/590555%20Supplementary%20Material.xlsx)
Supplement: Supplementary file 1 [file 590555%20Supplementary%20Material.xlsx]

## Sheet: 工作表1
Supplementary Table S1. Detailed monocular refractive and visual acuity outcomes at 3 months postoperatively.
New Group	#	Age	Gender	Eye	AXL	ACD	IOL	Pre-op Sphere (Sph)	Pre-op Cylinder (Cyl)	K1 (Flat K)	K2 (Steep K)	Best-Corrected Visual Acuity(BCVA)
Monovision	C2476	61	Female	OD	23.59	2.99	21	3.25	-2	44.5	45.25	0.6
Monovision	C2476	61	Female	OS	23.41	2.99	22	3.25	-1.5	43.25	44.25	0.7
Monovision	C2485	63	Female	OD	25.12	3.07	20.5	2	-0.75	40	40.25	0.7
Monovision	C2485	63	Female	OS	25.05	3.16	20	1.5	-1	40	40.5	0.5
Monovision	C2501	49	Female	OD	25.5	3.11	17	-4.25	-1	42	43.25	1
Monovision	C2501	49	Female	OS	25.07	3.11	18	-3.25	-1	42.25	43	1
Monovision	C2616	56	Male	OD	25.94	3.52	14.5	-10	0	43	44.25	0.4
Monovision	C2616	56	Male	OS	26.31	3.41	14.5	-7	-0.5	43	44	0.5
Monovision	C2619	71	Female	OD	23.53	3.26	20	1.25	-1	44.25	45.25	0.6
Monovision	C2619	71	Female	OS	23.41	3.03	20.5	3.25	-1	44.75	45	0.3
Monovision	C2671	69	Female	OD	24.45	3.12	16.5	-2.25	-0.75	45.5	45.75	0.3
Monovision	C2671	69	Female	OS	23.28	3.15	19.5	1	-1.75	45.75	46.5	0.4
Monovision	C2687	57	Female	OD	26.8	3.09	10.5	-8	-0.75	43.5	44.5	0.6
Monovision	C2687	57	Female	OS	26.67	3	12	-7.5	-1	43.25	44.25	0.7
Monovision	C2867	56	Female	OD	23.28	3.07	21	-1.25	-1	45.75	45.75	0.5
Monovision	C2867	56	Female	OS	22.31	3.02	23	0.25	-0.25	45.75	46.25	0.5
Monovision	C2894	69	Female	OD	24.19	3.59	17	NC	NC	45.25	45.75	0.5
Monovision	C2894	69	Female	OS	24.44	3.63	17	NC	NC	44.75	45.25	0.3
Monovision	C3031	61	Female	OD	26.56	3.11	12.5	-5.5	-0.75	43	43.5	0.8
Monovision	C3031	61	Female	OS	26.38	3.15	14.5	-5	-0.75	43.25	43.75	0.9
Monovision	C3037	55	Male	OD	25.44	3.15	15	-5.25	-1	44.25	44.5	1
Monovision	C3037	55	Male	OS	25.47	3.13	14	-5.5	-2	43.75	46	0.5
Monovision	C3038	74	Male	OD	24.08	3.13	21	3	-2	41.75	43.25	0.9
Monovision	C3038	74	Male	OS	24.09	3.13	21	NC	NC	42	43	NC
Monovision	C3047	61	Female	OD	27.14	3.05	12.5	-7.25	-1.25	41.75	42	0.3
Monovision	C3047	61	Female	OS	27.18	2.95	14	-5	-2	41	41.75	0.2
Monovision	C3065	48	Male	OD	26.26	3.05	15.5	-5.5	-0.5	41	42	0.4
Monovision	C3065	48	Male	OS	25.11	3.1	19.5	-1.5	-3.5	40.75	42.75	0.3
Monovision	C3069	71	Male	OD	23.46	2.66	21.5	-1.5	-2.5	43	44	0.2
Monovision	C3069	71	Male	OS	23.47	2.66	22	-1.25	-2.25	43.25	44.75	0.5
Monovision	C3185	58	Female	OD	25.14	3.17	17	-2.25	-3	42.5	43.5	0.7
Monovision	C3185	58	Female	OS	25.37	3.13	16	-3.25	-2	42.75	43.75	0.7
Monovision	C0158	71	Male	OD	25.6	2.75	14.5	-6	-1.25	43.75	43.75	1
Monovision	C0158	71	Male	OS	25.92	2.96	14	-7	-1	43.5	43.75	0.6
Monovision	C0163	57	Female	OD	25.88	3.31	20.5	1.5	-1.25	39.25	40	0.3
Monovision	C0163	57	Female	OS	25.67	3.33	21	1.5	-0.75	40	40.25	0.3
Monovision	C0197	62	Male	OD	22.97	3.18	22.5	2	-0.5	44.5	45	0.8
Monovision	C0197	62	Male	OS	23.04	3.19	22.5	2	0	44.25	44.5	0.8
Monovision	C0214	59	Female	OD	27.35	3.59	10	-6.75	-1.5	43.25	44	0.8
Monovision	C0214	59	Female	OS	27.09	3.67	10	-5.75	0	43.75	44.75	1
Monovision	C0238	63	Female	OD	25.54	3.45	14.5	-4.75	-1.5	45	45	0.9
Monovision	C0238	63	Female	OS	25.67	3.42	14	-4	0	43.75	44.5	0.3
Monovision	C872	48	Female	OD	27.02	3.04	10.5	-16.5	-1.75	43.33	44.01	0.3
Monovision	C872	48	Female	OS	26.89	3.2	12	-10.5	-0.75	42.93	43.7	0.3
Monovision	C894	68	Male	OD	24.4	3.43	17	0	-1.5	44.69	46.25	0.6
Monovision	C894	68	Male	OS	24.62	3.53	16	0	-2.25	44.27	46.06	0.6
Monovision	C901	71	Female	OD	23.9	2.74	20.5	2.75	-2.75	42.74	43.62	0.5
Monovision	C901	71	Female	OS	23.91	2.84	21	3.25	-0.5	42.14	43.17	0.4
Monovision	C928	62	Female	OD	23.12	3.22	19.5	1.5	-0.5	46.03	47.28	0.6
Monovision	C928	62	Female	OS	23.08	3.14	20	2	-0.25	45.55	47.41	0.6
Monovision	C963	72	Female	OD	23.37	2.81	22.5	4.25	-1	43.37	43.81	0.4
Monovision	C963	72	Female	OS	23.1	2.83	23.5	7	0	43.43	43.81	NC
Monovision	C1105	72	Female	OD	23.08	2.7	22	1	-1	43.92	44.71	0.7
Monovision	C1105	72	Female	OS	23.08	2.66	22.5	1	-0.5	44.29	44.84	0.7
Monovision	C057	59	Male	OD	25.48	3.29	14.5	-4.5	-2	43.75	45.75	0.5
Monovision	C057	59	Male	OS	25.91	3.4	12	-6.75	-0.75	44.5	45	0.6
Monovision	C064	62	Female	OD	22.57	3.45	21	0.25	-1.25	46.25	47.25	0.5
Monovision	C064	62	Female	OS	23.15	3.31	19	-0.25	-0.75	46.25	47	0.5
Monovision	C220	74	Female	OD	23.27	2.95	19.5	-1	-2	44.75	46	0.2
Monovision	C220	74	Female	OS	23.26	2.92	20.5	-3	-2	45	46.5	0.2
Monovision	C1082	50	Male	OD	27.18	3.35	10.5	-8	-0.5	43.3	43.79	0.4
Monovision	C1082	50	Male	OS	27.33	3.35	10	-8.75	-0.5	43.72	44.36	0.4
Monovision	C1098	60	Female	OD	24.77	3.41	16	-8	-2	43.62	45.55	0.4
Monovision	C1098	60	Female	OS	24.59	3.29	17	-6	-0.5	43.7	45.3	0.4
Monovision	C316	63	Male	OD	25.21	2.57	14.5	-11.5	-1.25	44	45.75	0.3
Monovision	C317	63	Male	OS	24.97	2.62	16	-7.5	-0.5	44.25	46.25	0.5
Monovision	C073	68	Female	OD	23.2	3.01	20.5	-0.75	-0.25	45.5	45.75	0.3
Monovision	C073	68	Female	OS	23.27	3	21	-0.25	-0.5	45.25	45.5	0.4
Monovision	C105	67	Male	OD	25.12	3.26	19	-0.5	-0.75	41.25	41.75	0.3
Monovision	C105	67	Male	OS	25.39	2.85	19.5	0	-2.25	40	42	0.3
Monovision	C578	61	Female	OD	21.78	2.63	24.5	2.5	-1	46.5	46.75	1
Monovision	C578	61	Female	OS	21.62	2.36	25	3	-1.75	46.75	47	0.9
Monovision	C589	60	Male	OD	25.62	3.63	18.5	-2.25	-1.25	40.5	41	0.3
Monovision	C589	60	Male	OS	25.93	3.74	19	-1.5	-0.75	40	40.5	0.5
Monovision	C626	44	Male	OD	27.38	2.97	10.5	-11	-1	43	43.5	0.2
Monovision	C626	44	Male	OS	26.87	3.01	11	-9	-0.5	43	43.75	0.4
Monovision	476466	53	Female	OD	27.52	3.5	10.5	-7	-1.5	42.75	44	0.6
Monovision	476466	53	Female	OS	27.6	3.48	11.5	-5.25	-0.75	41.75	42.25	0.6
Monovision	477954	58	Male	OD	27.35	3.17	10	-6.75	-1.5	43	45.5	0.8
Monovision	477954	58	Male	OS	25.82	3.09	15	-4	-0.25	43.75	45.25	0.9
Monovision	451208	68	Female	OD	24.84	3.55	14	-3.25	-1.75	46	47.5	0.3
Monovision	451208	68	Female	OS	24.66	3.47	13	-4.25	-0.5	46.25	46.75	0.7
Monovision	461227	67	Male	OD	25.71	3.28	17.5	-4	-0.75	41.5	42.25	0.6
Monovision	461227	67	Male	OS	26.5	3.3	14	-6.75	-0.5	42	42.75	0.6
Monovision	19752	59	Female	OD	23.16	3.06	20	0.5	-0.75	45.5	45.5	0.6
Monovision	19752	59	Female	OS	23.14	3.12	20.5	0.75	-0.5	45.25	45.5	0.6
Emmetropia	C2440	61	Female	OD	23.28	3.46	18.5	NC	NC	46.5	47.5	0.2
Emmetropia	C2440	61	Female	OS	23.76	3.29	17	NC	NC	46.25	47.25	0.16
Emmetropia	C2463	60	Female	OD	25.05	3.44	14.5	-1.75	-1.5	44.75	45.25	1
Emmetropia	C2463	60	Female	OS	24.97	3.42	14.5	-2	-1	44.75	45.25	1
Emmetropia	C2479	55	Female	OD	25.95	2.97	12	-7.75	-0.75	44	44.75	0.8
Emmetropia	C2479	55	Female	OS	25.97	2.93	12.5	-7.5	-1.5	43.5	45	0.6
Emmetropia	C2500	55	Female	OD	23.31	3.57	22	1.75	-0.5	44	44.75	0.7
Emmetropia	C2500	55	Female	OS	23.19	3.53	22	1.75	-0.25	44	45	0.7
Emmetropia	C2504	54	Male	OD	27.34	3.42	10.5	-10	-0.5	43.25	44	0.4
Emmetropia	C2504	54	Male	OS	26.94	3.42	12	-5.5	-0.5	43	43.75	0.5
Emmetropia	C2645	54	Male	OD	27.51	3.73	13	-12	-1.5	41	41.5	0.3
Emmetropia	C2645	54	Male	OS	27.5	3.79	13.5	-7	-0.75	41.25	41.25	0.7
Emmetropia	C2701	57	Female	OD	23.99	3.09	16.5	-4.5	-1.75	46.5	46.75	0.6
Emmetropia	C2701	57	Female	OS	24.05	2.93	16.5	-4.75	-1	46.5	47	0.8
Emmetropia	C2943	53	Male	OD	24.34	3.49	19	-0.5	-0.25	44	44.25	1
Emmetropia	C2943	53	Male	OS	24.32	3.58	18.5	-0.25	-0.5	44	44.5	1
Emmetropia	C3007	55	Male	OD	25.02	3.5	15	-4.25	-1.5	44.75	45.25	0.6
Emmetropia	C3007	55	Male	OS	25.01	3.25	16.5	-2.75	-0.75	44.25	45.25	0.9
Emmetropia	C3016	56	Female	OD	22.86	3.02	23	2.5	-1	44.5	44.75	0.9
Emmetropia	C3016	56	Female	OS	22.87	2.97	23	2.5	-0.75	44.25	44.75	1
Emmetropia	C3143	54	Female	OD	22.34	2.33	25.5	2.75	-0.75	42.75	43.5	0.5
Emmetropia	C3143	54	Female	OS	22.25	2.39	25	3.5	-1.1	43.5	44.25	0.3
Emmetropia	C0080	68	Female	OD	23.22	2.82	23	3.25	-1.25	42.75	43	0.7
Emmetropia	C0080	68	Female	OS	23.37	2.78	22.5	3.25	-1.25	42.75	42.75	0.7
Emmetropia	C896	55	Female	OD	25.86	3.33	14	-4	-1.25	43.3	43.56	1
Emmetropia	C896	55	Female	OS	25.7	3.45	14.5	-4	-0.75	43.47	43.8	1
Emmetropia	C967	57	Female	OD	23.82	3.05	19	0.75	-1	44.57	45.57	1
Emmetropia	C967	57	Female	OS	23.72	3.04	19	1	-1	44.23	45.91	0.8
Emmetropia	C975	74	Male	OD	22.41	2.86	24.5	4	-0.75	44.69	45.37	0.6
Emmetropia	C975	74	Male	OS	22.29	2.7	24.5	4	-1	43.68	44.99	0.6
Emmetropia	C980	55	Male	OD	27.53	3.7	10.5	-10	-2	42.68	43.03	0.2
Emmetropia	C980	55	Male	OS	27.23	3.61	11	-8	-3	43.1	43.1	0.3
Emmetropia	C983	78	Female	OD	24.07	3.08	19.5	-0.75	-0.75	43.51	44.11	0.4
Emmetropia	C983	78	Female	OS	23.91	2.93	20	-0.5	0	43.67	43.92	0.5
Emmetropia	C1012	59	Male	OD	25.11	3.37	15	-3.75	-1.25	44.19	44.82	0.8
Emmetropia	C1012	59	Male	OS	25.24	3.25	15.5	-4	-0.75	44.2	44.6	0.7
Emmetropia	C1032	60	Female	OD	23.54	3.19	22	3	0	43.27	43.99	0.7
Emmetropia	C1032	60	Female	OS	23.83	3.06	21	2	-1.25	42.64	43.7	0.5
Emmetropia	C1066	65	Male	OD	25.11	3.43	19.5	-4	-0.75	41.15	41.35	0.3
Emmetropia	C1066	65	Male	OS	24.94	3.24	19	1	-1	41.74	42.2	0.5
Emmetropia	C1100	42	Male	OD	24.97	3.94	15.5	-2.5	0	44.67	45.11	0.7
Emmetropia	C1100	42	Male	OS	24.33	3.92	17.5	-1.25	0	44.39	45.74	0.7
Emmetropia	C1111	70	Male	OD	23.43	2.92	23.5	2.75	0	42.25	42.46	0.6
Emmetropia	C1111	70	Male	OS	23.57	2.93	24	3.5	0	41.69	42.17	0.6
Emmetropia	C265	67	Male	OD	26.15	3.33	12.5	-4.5	-1.5	44.25	44.75	0.5
Emmetropia	C265	67	Male	OS	26.34	3.24	12.5	-5.5	-2	44	45	0.6
Emmetropia	C125	59	Female	OD	22.16	2.57	23.5	0.5	-2.25	45.25	45.75	0.6
Emmetropia	C125	59	Female	OS	22.11	2.96	23.5	0	-2.25	46	46.5	0.3
Emmetropia	421712	86	Male	OD	23.54	2.47	23.5	1.25	-0.75	41	42	0.3
Emmetropia	421712	86	Male	OS	23.32	2.57	23	2.25	-1.75	41.75	42.75	0.5
Emmetropia	500420	63	Female	OD	25.25	2.88	13.5	-4	-0.75	44.75	45.75	0.5
Emmetropia	500420	63	Female	OS	25.15	2.86	14	-3.75	-1	45	45.5	0.4
Emmetropia	570202	56	Female	OD	26.35	3.22	10.5	-7	-0.75	44.25	45.5	0.7
Emmetropia	570202	56	Female	OS	26.2	3.12	11.5	-7.25	-1	44.75	45.75	0.7
Emmetropia	430302	71	Female	OD	23.36	2.84	20	-2.75	-0.5	44.75	45.75	0.3
Emmetropia	430302	71	Female	OS	23.74	2.89	21	-1.5	-0.75	43.25	44.5	0.2
Emmetropia	511129	62	Female	OD	25.69	3.39	16.5	-3.25	-1.5	42.5	43	0.5
Emmetropia	511129	62	Female	OS	25.28	3.36	17	-0.25	-1.25	42.5	43.25	0.8
